# Supplementary material
Source: PubMed Central journal article supplement (PMC4476321)
Supplement: NIHMS699447-supplement-Supplemental_Information.pdf [file NIHMS699447-supplement-Supplemental_Information.pdf]

**Supplementary Information for "Functional Proteins from a Random-Sequence Library"****Nature, v410, 715**

Anthony D. Keefe and Jack W. Szostak

## Generalized Random Library sequence (DNA)

TTCTAATACGACTCACTATAGGGACAATTACTATTTACAATTACAATGGACTACAAAGACGACGACGATAAGAAGACTYACTGZ (XYZ)<sub>18</sub>YACTGZ (XYZ)<sub>18</sub>YACTGZ (XYZ)<sub>18</sub>YACTGZ (XYZ)<sub>18</sub>YACTGG'

## Average nucleotide composition of random parts of Random Library

X Y Z

A 35 33 0

T 20 29 22

G 27 21 49

C 18 17 29

(%)

## Generalized Random Library sequence (Protein)

MDYKDDDDKKT(Random)<sub>81</sub>WSASCHHHHHHMGMMSG

## Average amino acid composition of random part of Random Library (Protein)

Ala 4.1 Leu 7.4

Arg 6.8 Lys 5.1

Asn 7.5 Met 4.5

Asp 5.5 Phe 2.8

Cys 4.6 Pro 2.8

Gln 2.6 Ser 6.6

Glu 4.0 Thr 5.4

Gly 5.3 Trp 4.4

His 3.8 Tyr 5.0

Ile 4.8 Val 7.1

(%)

## Selected clones from round 8

## Family A

08-05MNYKDDDDKKTHTWYTNNSGFAMTSLRFMMIKWYNWWHDQRHRNIRHHRAMAPRN

CRIQAITPTHGHDLPSFEDWRWRDYRYNRDKTMAKGYQPWSASCHHHHHHMGMSG  
08-07MDYKDDDDKKTHTWYTNSTGAMTSLRFMMIKWYDWWHDQRHRNIRHHRAMAPRN  
CRIQAITPTHGHDLPSFEDWRWDYRYNRDKTMAKGYQPWSASCHHHHHHMGMSG  
08-09MDYKDDDDKKTHTWYTNSTGAMTSLRFMMIKWNNWWHDQRHRNIRHHRAMAPRN  
CRIQAITPAHGHDLPSFEDWRWDYRYNRDKTMAKGYQPWSASCHHHHHHMGMSG  
08-48MDYKDDDDKKTHTWYTNSTGAMTSLRFMMIKWYNWWHDQRHRNIRHHRAMAPRN  
CRIQAITPTHGHDPQSFEFEDWRWDYRYNRDKTMAKDYQPWSASCHHHHHHMGMSG

Family B

08-01MDYKDDDDKKTNCHQKRIYRVKPCVICKVAPRDWVWENRHLRIYTMCKTCFSN  
CINYGDDTYGHDDWLMYTDCKEFSNTYHNLGRLPDEDRWSASCHHHHHHMGMSG  
08-04MDYKDDDDKKTNWHQKRIYRVKPCVICKVAPRDWVWENRHLRIYTMCKTCFSN  
CINSGDDTYGHDDWLMYTDCKEFSNTYHNLGRLPDEDRWSASCHHHHHHMGMSG  
08-08MDYKDDDDKKTNWHQKRIYRVKPCVICKVAPRDWVWENRHLRIYTMCKTCFSN  
CINNGDDTYGHDDWLMYTDCKEFSNTYHDLGRLPDEDRWSASCHHHHHHMGMSG  
08-10MDYKDDDDKKTNWHQKRIYRVKPCVICKVAPRDWVWENRHLRIYTMCKTCFSN  
CINYGDDTYGHDDWLMYTDCEEFSNTYHNLGRLPDEDRWSASCHHHHHHMGMSG  
08-12MDYKDDDDKKTNCHQKRIYRVKPCVICKVAPRDWVWENGLHLRIYTMCKTCFSN  
CINYGDDTYGHDDWLMYTDCKEFSNTYHNLDRLPDEDRWSASCHHHHHHMGMSG  
08-13MDYKDDDDKKTNWHQKRIYRVKPCVICKVAPRDWVWENRHLRIYTMCKTCFSN  
CINYGDDTYGHDDWLMYTDCKEFSNTYHNLGRLPDEDRWSASCHHHHHHMGMSG  
08-14MDYKDDDDKKTNWHQKRIYRVKPCVICKVAPRDWVWENKHLRIYTMCKTCFSN  
CINYGDDTYGHDDWLMYTDCKEFSNTYHNLGRLPDEDRWSASCHHHHHHMGMSG  
08-15MDYKDDDDKKTNWHQKRIYRVKPCVICKVAPRDWVWENRHLRIYTMCKTCFSN  
CINYGDDTYGHDDWLMYTDCKEFSNTYHNLGRLPDEDRWSASCHHHHHHMGMSG  
08-18MDYKDDDDKKTNWHQKRIYRVKPCVICKVAPRDWVWENRHLRIYTMCKTCFSN  
CVNYGDDTYGHDDWLMYTDCKEFSNTYHNLGRLPDEDRWSASCHHHHHHMGMSG  
08-21MDYKDDDDKKTNWHQKRIYRVKPCVICKVAPRDWVWENRHLRIYTMCKTCFSN  
CINNGDDTYGHDDWLMYTDCKEFSNTYHNLGRLPDEDRWSASCHHHHHHMGMSG  
08-23MDYKDDDDKKTNWHQKRIYRVKPCVICKVAPRDWVWENRRLRIYTMCKTCFSN  
CINYGDDTYGHDDWLMYTDCKEFSNTYHNLGRLPDEDRWSASCHHHHHHMGMSG  
08-45MDYKDDDDKKTNWHQKRIYRMKPCVICKVAPRDWVWENRHLRIYTMCKTCFSN  
CINYGDDTYGHDDWLIYTDCKEFSNTYHNLGRLPDEDRWSASCHHHHHHMGMSG  
08-46MDYKDDDDKKTNWHQKRIYRVKPCVICKVAPRDWVWENRHLRIYTMCKTCFSN  
CINYGDDTYGHDDWLMYTDCKEFSNTYHNLGRLPDEDRWSASCHHHHHHMGMSG

08-47MDYKDDDDGKKTNWHQKRIYRVKPCVICKVAPRDWVVENRHLRIYTMCKTCFSN

CINYGDDTTYGHDDWLMYTDCKEFSNTYHNLGRLPDEDRWSASCHHHHHHMGMSG

Family C

08-11MDYKDVDDKKTCDKTVSVDMTFRVRNMKVAKDCWSVVVWTKRSNYFSGRQLH

CDSWHHYNSRRFGTETKLAYWELPKWKWKINNTHAINIHWSASCHHHHHHMGMSG

08-17MDYKIDDDKKTCDKAVSVDMTFRVRNMKVAKDCWSVVVWTKRSNYFNGRQLH

CDSWHHYNSRRFGTETKLAYWELPKWKWKINNTHAINIHWSASCHHHHHHMGMSG

08-19MDYKIDDDKKTCDKAVSIDMTFRVRNMKVAKDCWSVVVWTKRSNYFSGRQLH

**SD**SWHHYNSRRFGTETKLAYWELPKWKWKINNTHAINIHWSASCHHHHHHMGMSG

08-06MDYKDVDDKKTCDKAVSVDMTFRVRNMKVAKDCWSVVVWTKRSNYFSGRQLH

CDSWHHYNSRRFGTETKLAYWELPKWKWKINNTHAINIHWSASCHHHHHHMGMSG

Family D

08-20MDYKDDDDKKT~~Y~~WHALVTYNKTL~~S~~YRLATKFTDWWNLDP~~P~~PRNQTKVSELNLH

WLKSGGKGTQKAHSINEISNWVHQHELSDKSMRLH~~S~~KVRWSASCHHHHHHMGMSG

Selected clones from round 18

18-01MDYKDDDDKKT~~N~~WQKRIY~~Q~~VRPCVICKVAPRDWRVENRHLRIYNMCKTCFSNS

**VD**YGDDTTYGHDDWLMYTDCKEFSNTYHNLGRLPDEDRHWSASCHHHHHHMGMSG

18-02MDYKDDDDKKT~~N~~WQKR~~V~~YR~~A~~RPCVICKVAPRDWRV~~V~~NRHLRIYNMCKTCFSNS

**IN**HGDDTTY~~H~~G~~H~~N~~D~~WLMYTDC~~E~~E~~F~~S~~S~~T~~C~~H~~N~~L~~G~~R~~Q~~PDEDRHWSASCHHHHHHMGMSG

18-03MDYKDDDDKKT~~Y~~WQKRIYRV~~R~~PCVICKVAPRDWRV~~K~~N~~G~~H~~L~~RIYNMCKTCFSNS

**IK**CGDDTTYGHDDW~~L~~I~~H~~TDC~~K~~D~~F~~SNTYLNLGRLPDE~~E~~RHWSASCHHHHHHMGMSG

18-04MDYKDDDDKKT~~N~~WQKR~~V~~YRV~~R~~PCV~~V~~CKE~~A~~PRDWRV~~K~~D~~R~~H~~L~~RIYNMCKTCFSNS

**IN**YGDDT~~H~~YGHDDWLMYTDC~~K~~G~~F~~SNTYH~~N~~P~~S~~R~~L~~PDEDRHWSASCHHHHHHMGMSG

18-05MDYKDDDDKKT~~N~~WQKRIYRV~~G~~PCVICKVAPRDWRVENRHLRIY~~T~~MCKTCFSNS

**I**YGD~~N~~T~~Y~~H~~G~~H~~E~~DWLMYT~~D~~S~~K~~EFSNTYH~~N~~Q~~G~~R~~L~~P~~D~~VDRHWSASCHHHHHHMGMSG

18-06MDYKDDDDKKT~~N~~WQKRIYRV~~K~~PCVICKVAPRDWRVENRHLRIYNMCKTCFSNS

**IN**NGDDTY~~H~~G~~H~~DDWLMYTDCKEFSNTYHNLGRLPDEDRHWSASCHHHHHHMGMSG

18-07MDYKDDDDKKT~~N~~WQKR~~T~~YRV~~R~~PCVICKVAPRDWRV~~V~~NRHLRIYNMCKTCFSNS

**IN**YGDDTTYGHDDWLMYTDCKE~~Y~~SNTYHNLGRLPDEDRHWSASCHHHHHHMGMSG

18-08MDYKDDDDKKT~~N~~WQKR~~F~~YRV~~R~~PCVICKVAPRDWRV~~K~~N~~G~~H~~L~~RIYNMCKTCFSNS

**IK**YGDDTTYGHDDWLMYTDCKEFSNTYHNLGRLP~~N~~EDRHWSASCHHHHHHMGMSG

18-09MDYKDDDDKKT~~N~~WQKR~~F~~YRV~~K~~PCV~~F~~CKVAPRDWRV~~E~~N~~G~~H~~L~~RIYNMCKTCFSNS

**L**NNGDDT~~H~~YGHDDWLMYTDCKEFSNTYHNLGRLPDEDRHWSASCHHHHHHMGMSG

18-10MDYKDDDDKKTNWQKRIYRVRPCVCKVAPRDWRVENRHLRIYNMCKTCYSNS  
INYGDDTYYGHEHDWLLYTDCEEFSENTYHNLGRLPDEDRHWSASCHHHHHHMGMSG

18-11MDYKDDDDKETSWHKLMYQVRPCVICKVAPRDWRVENRHLRIYTMCKTCFNNS  
VNYGDDTHHGHNDWLMYADCNEFTNTCRNLARLPDEDRHWSASCHHHHHHMGMSG

18-12MDYKDDDDKKTNRQKLI FRVKPCVICKVAPRDWQVENGHLRIYNMCKTCFINS  
INNGDDTYHGHDWLMHTDCTEFSENTYHNLGRLPGEDRHWSASCHHHHHHMGMSG

18-13MNYKDDDDKKTNWQNRINRVRPCVICKVAPRDWCVKNGHLRIYNMCKSCFSDC  
INYGDDTHYGHEDWLMYTDCKEFSNTYHNLGRIPKDRHWSASCHHHHHHMGMSG

18-14MATKDDDDKKTNRQKRI FRVKPCVICKVAPRDWRVRNGHLRIYNMCKTCFSNS  
INYGDDTYYGHDDRLMYTDCEFSNTYHNLGKLPDEDRHWSASCHHHHHHMGMSG

18-15MDYKDDDDKKTNWLKRIYRVKPCVCKVAPRDWRVKNRHLRIHNMCKTCYSNS  
VNYGDDTYYGHDDWLMYTDCEEFSENTYPNLGS LPDEDRHWSASCHHHHHHMGMSG

18-16MDYKDDDDVKTNWQKRIYRVRPCVICKVAPRDWRVENRHLRIYNMCKTCFSNS  
INNGDDTYYGHDDWLMYTDSEKFSYTYHNLGWQPVEDRHWSASCHHHHHHMGMSG

18-17MDYKDDDDKKTNWQKRTYRVRPCVICKVAPRDWRVKNRHLRIYNMCKTCFSNS  
INYGEDTYYGHEHDWLMYTDCEEFSTYHNLGRLPGEDRHWSASCHHHHHHMGMSG

18-18MDYKDDDDKKTNWQKRIYRVKPCVCKVAPRDWRVKNRHLRIYNMCKTCYSNS  
VNYGDDTYYGHDDWLMYTDCEEFSENTYHNLGRLPDEDRHWSASCHHHHHHMGMSG

18-19MDYKDDDDKKTNWLKRIYRVRPCVCKVAPRNWVKVKNHLRIYNMCKTCFNNS  
IDIGDDTYHGHDWLMYADSKESISNTYHNLGRLPNEDKHWSASCHHHHHHMGMSG

18-20MDYKDDDDKKTNWQKRIYRVGPCVICKVAPRDWRVENGHLRIYNMCKTCFGNS  
INNGDDTNFGHDDWLMYTDCKEFSNTYHHLGGLPDEDRHWSASCHHHHHHMGMSG

18-21MDYKDDDDKKTNWQKRIHRVGPCVICKVAPRDWRVRNRHLRIYNMCKTCFSNS  
IKYGDDTYYGHDDWLMYTDCKEFSDTYHNLGRLPDEDRHWSASCHHHHHHMGMSG

18-22MDYKDDDDKKTNRQKRIYRVRPCVICKVAPRDWRVENRHLRVYNMCKTCFSNS  
IHYGDDTYHGHDWLLHTDCKEFSNTYHQLGMPDEARHWSASCHHHHHHMGMSG

18-23MDYKDYDDKKTNWQKRICRVKPCVICKVAPRDWRVKNRHLRIYNMCKTCFSNS  
IKYGDDTYYGHDDWLMNTDCKEFSNTYHNLGRLPDEDRHWSASCHHHHHHMGMSG

18-24MDYKDDDDKKTNRQERLCRVRPCVFCVAPRDWRVENKHLRIYNMCKTCFSNS  
IKYGDDTYHGHDWLMYTDCKEFSNTYHNLDRLPDEDRHWSASCHHHHHHMGMSG

18-25MDYKDDDDKKTNWQKRIYRVRPCVICKVAPRDWRVKNRHLRIYNMCKSCFSNS  
INNGDDTYYGHDDWLMYTNCEEFSSYTYHNLGRLPDEDRHWSASCHHHHHHMGMSG

18-26MDYKDDDDKKTNRQKRLFRVRPCVICKVAPRDWRVENGHLRIYNMCKTCFSNS  
ISNGDDTYFGHEDRLIYSDCKEFSKTNHNPGRLPDVKHWSASCHHHHHHMGMSG

18-27MDYKDDDDKKTNWQKRN**Y**WVRPCV**I**CK**E**APRDWRVENRHLRIYNMCKTCFSNS  
IKSGDDTYYGHDDWLMYTDCKEFS**D**RYHNLARLP**Y**EDRHWSASCHHHHHHMGMSG

18-29MDYKDDDDKKTNWQKRN**Y**RVRPCV**I**CRVAPRDWRV**K**NGHLRIYNMCKTCFSNS  
INYGDDTYYGHDDWLMYTD**S**EFSNTYHNLDRLPD**G**DRHWSASCHHHHHHMGMSG

18-30MDYKDDDDKKTNWQK**P**IYRVRPCV**I**CKVAPRDWRV**K**NRNLRINMCKTCFS**S**D  
IKYGDDT**F**HGHDDRL**M**FT**S**KEFSNTY**H**D**Q**GR**Q**PDEDRHWSASCHHHHHHMGMSG

18-31MDYKDDDDKKTNWQKRIYRVRPCV**I**CK**E**APRDWRV**K**NGHLRIYNMCKTCFSNS  
INYGDDTY**H**GHDDWLI**Y**KDCKEFSN**M**YHNLGRLPDEDRHWSASCHHHHHHMGMSG

18-32MDYKDDDDKKTNWQKRIYRV**K**PCV**I**CKVAPR**N**WRVENRHLRIYNMCKTC**Y**SNS  
INYGDDTY**H**GHDDWLMY**T**GCKEFSNTYHNLGRLPDE**V**RHWSASCHHHHHHMGMSG

18-33**M**NYKDDDDKKTNWQKHILRVRPCV**V**CKVAPRDWRV**K**NKHLRIYNMCKTCFSNS  
INCGDDT**H**YGH**K**DWLI**Y**TDCKE**S**SKTY**H**DLGRLPDEDRHWSASCHHHHHHMGMSG

18-34MDYK**G**DDDDKKTNR**Q**KRIYR**A**RPCV**I**CKVAPRDWRV**E**KRHLRIYNMCKTC**Y**NNS  
IN**Y**EDDTY**H**GHDD**L**GMYTDCKEFSNTY**H**DLGRLPDE**D**KHWSASCHHHHHHMGMSG

18-37MDYKDDDDK**P**N**L**KRN**H**RVRPC**M**ICKVAPRDWRV**E**NGHLRI**Y**TMCKTC**F**GN  
INYGDDT**H**HGHEDL**M**MNTDCKE**Y**S**Y**AHNLGRLP**H**EDRHWSASCHHHHHHMGMSG

18-38MDYKDDDDKKTNW**K**KRI**Y**QVRPCV**N**CKVAPRDWRVENRHLRVYNM**C**RTCFNS  
INYGDDT**F**YGHDDWLI**L**HTDCK**Q**FSNTYHNLGR**P**PDEDRHWSASCHHHHHHMGMSG

18-39MDYKDDDDKKTNW**L**KRIYRVRPCV**V**CKVAPRDW**R**L**K**NGHLRIYNMCKTCFSNS  
**T**NNGDDTYYGHDDWLM**N**TDCKEFSN**S**YHNLGRLPDE**D**RAWSASCHHHHHHMGMSG

18-41MD**N**KDDDDKKTNWQ**K**CFYRVRPCV**V**CK**A**APRDWRVENRRLRIYNMCKTC**Y**SNS  
IN**F**GDDT**H**YGHDDWLM**S**DSKEFSNTYHNLGR**P**DE**E**RHWSASCHHHHHHMGMSG

18-44MDYKDDDDKKTNWQKRI**Y**Q**M**KPCV**V**CKVAPRDWRV**K**NRHLRIYNMCKTCFSNS  
INYGDD**S**Y**G**HDDWLM**N**T**S**KEF**Y**NTYHNLGRL**S**D**A**DRHWSASCHHHHHHMGMSG

18-46MDYKDDDDKKTNR**Q**KRIYRVRPCV**I**CKVAP**Q**DWRVENRRLRIYNMCKTCFSNS  
INYGDDT**H**YGH**V**DWLM**D**M**S**KEFSNTYHNLGRLP**V**EDRHWSASCHHHHHHMGMSG

18-47MDYKDDDDKKTNWQKRIYRVRPCV**V**CK**E**APRDWR**M**VDRHLRIYNMCKTCFSNS  
**N**NYGDDTYYGHDDRL**L**YTDCKE**S**SNTYH**N**P**G**GLPDEDRHWSASCHHHHHHMGMSG

18-48MDYKDDDDKKTNWQKRIYRVRPCV**I**CKVAPRDWRVENRHLRIYNMCKTCFSNS  
IKYGDDTY**H**GHDDWLM**N**TDCK**V**FSNTYHNLGRLPDEDRHWSASCHHHHHHMGMSG

18-51MDYKDDDDK**A**NWQ**K**HIYRVRPCV**I**CKVAPRDW**M**ENGLRI**Y**TMCKTCFSNS  
IN**N**GDDTY**H**GHEDWLM**Y**KDCKEFS**S**TYHNLGRLP**V**EDRHWSASCHHHHHHMGMSG

18-52MDYKDD**Y**KKTNWQ**K**P**I**FRARPCV**K**CKVAPRDW**V**ENRHLRIYNMCKTC**F**NNS  
INYGDDTYYGHDDWLV**Y**TDCKEFSNTYHNLGRLPDEDRHWSASCHHHHHHMGMSG

18-54MDYKDDDDKKTNWQKRIYRVRPCVICKVAPRDWRVENRHLRIYNMCKTCFSNS  
 INHGDDTYFGHDDWLMYTD**R**KFEFSNTY**Y**NLGR**L**PGEDRHWSASCHHHHHHMGMSG

18-56MDYKDDDDKKTNWQKHIIYRVRPCV**R**CKVAPRDWRVEN**G**HLRIYNMCKTCFSNS  
 INYGDDTYNGHDDW**P**LYTDSKEFSNTYHNLDR**P**PDEDRHWSASCHHHHHHMGMSG

18-57MDYKDDNDKMTNRQKRIYRVRPCVVCKVAPRDWRVENRHLRIYNMCKTCFS**S**  
 I**K**YRDDT**H**HGHDDWLMYTDC**M**EFSNTYHNL**G**WLPDEDRHWSASCHHHHHHMGMSG

18-60MDYKDDDDKKTNW**L**KRNYRV**K**PCVNCKVAPRDWRV**K**NRHLRIYNMCKTC**Y**SNS  
 INYGDDTYYGHDDWLMYTDC**E**EFSNTYHNR**G**RLPDEDRHWSASCHHHHHHMGMSG

18-61MDYKDDDDKKTNW**R**KRIYRVRPCVICKVAPRDWRV**E**D**S**HLRIYNMCKTCFSNS  
 INYGDDTY**F**GHEDWLMYTDCKEFSNTYHNLDR**L**PDE**N**RHWSASCHHHHHHMGMSG

18-62MDYKDDDDKKTNWQKRIYRVRPCV**K**CKVAPRDWRVEN**S**HLRIYNMCKTCFSNS  
 INYGDDT**H**YGHV**D**WVMYTDC**M**KFSNTYHNL**S**RLPDE**N**RHWSASCHHHHHHMGMSG

18-63MDYKDDDDK**A**YWQ**E**RIYRV**K**PCVICKVAPRDWRV**K**NRHLRIYNMCK**S**CFSNS  
 I**I**YGDDTY**H**HGHDDWLMYTDCKE**F**FN**T**YHNLGR**L**PDEDRHWSASCHHHHHHMGMSG

18-64MDYKDDDDKKT**Y**WQKRIYRV**K**PCVICK**E**APRDWRV**K**NRHLRIYNMCKTCFSNS  
 V**N**IGDDTY**H**HGHDDW**L**DE**Y**DCKEFSNT**C**HNLGR**L**PGED**K**HWSASCHHHHHHMGMSG

18-65MDYKDDDDKKT**Y**WQKRIYRVRPCVVCKVAPRDWRVENRHLRIYNMCKTCFSNS  
 INYGDDT**H**YGHDDW**L**M**N**TDCKEFSNTYH**N**P**G**KL**P**DEDRHWSASCHHHHHHMGMSG

18-66MDYKDDDDKKTNWQ**K**SIY**R**E**K**PCVVCKVAPRDWRVEN**G**HLRIYNMCKTC**Y**SNS  
 INYGDDTYYGHDDWLMY**K**DCKEFSNTY**H**Y**Q**GR**L**PE**D**DRHWSASCHHHHHHMGMSG

18-67MDYKDDDDKKTNWQKRIYRVRPCVICKVAPRDWRVENRHLRIYNMCKTCFSNS  
 I**N**NGDDTY**H**HGHDDW**L**YTD**R**KFEFSNTYHNLGR**L**PDEDRHWSASCHHHHHHMGMSG

18-68MDYKDDDDKKTNWQKRIYRVRPCVICKVAPRDWRVENRHLRIYNMCKTCFSNS  
 INYGDDT**F**YGHDDWLMYTDSKEFSNTYHNLGR**L**PDEDRHWSASCHHHHHHMGMSG

18-72MDYKDDDDKKT**I**RQKRIYRVRPCVNCKVAPRDWRVENRHLRIYNMCKTCFSNS  
 I**N**YRDDTYYGHDDW**L**IYTDCEFSNTYHNLGR**L**PD**K**DRHWSASCHHHHHHMGMSG

Fuller description of protocol for a round of selection:

#### ***In vitro* selection and amplification**

RNA was produced from the DNA library with T7 RNA polymerase and mRNA-displayed proteins were generated as previously described<sup>8,9</sup>. The linker, which connects the RNA 3'-terminus to the protein C-terminus, had the following sequence: (dA)<sub>21</sub>(triethylene glycol phosphate ester)<sub>3</sub>dAdCdCPuromycin (made using reagents from Glen Research, Sterling, VA). A 10 ml translation (400 nM template, Red Nova Rabbit Reticulocyte Lysate (Novagen, Madison, WI), according to the manufacturer's instructions with 85 mM additional KCl, 0.85 mM additional Mg(OAc)<sub>2</sub> and 25 nM <sup>35</sup>S-methionine) incubated at 30°C for one hour yielded 7x10<sup>13</sup> mRNA-displayed proteins after high-salt incubation (600 mM KCl, 25 mM MgCl<sub>2</sub>). The translation mixture was then diluted ten-fold into oligo(dT)cellulose binding buffer (1 M KCl, 100 mM Tris(hydroxymethyl) amino methane, 0.25% w/v Triton X-100, pH 8.0) and this mixture was incubated with 2 mg/ml oligo(dT)cellulose (Pharmacia, Piscataway, NJ) for fifteen minutes at 4°C with rotation. The oligo(dT)cellulose was washed on a chromatography column (Bio-Rad, Hercules, CA) with the same oligo(dT)cellulose binding buffer and then eluted with deionized water. The eluate was mixed with 2x Ni-NTA binding buffer (1x is 6 M guanidinium chloride, 0.5 M NaCl, 100 mM sodium phosphate, 10 mM Tris(hydroxymethyl)amino methane, 10 mM 2-mercaptoethanol, 0.25% w/v Triton X-100, pH 8.0) and then incubated with Ni-NTA agarose (Qiagen, Valencia, CA) for one

hour at 4°C with rotation. The Ni-NTA agarose was then washed with Ni-NTA first wash buffer (8 M urea, 0.5 M NaCl, 100 mM sodium phosphate, 10 mM Tris(hydroxymethyl)amino methane, 10 mM 2-mercaptoethanol, 0.25% w/v Triton X-100, pH 6.3) and then with a gradient of increasing amounts of Ni-NTA second wash buffer (0.5 M NaCl, 10 mM Tris(hydroxymethyl)amino methane, 10 mM 2-mercaptoethanol, 0.25% w/v Triton X-100, pH 8.0), and then was eluted with Ni-NTA elution buffer (0.25 M imidazole, 0.5 M NaCl, 10 mM Tris(hydroxymethyl) amino methane, 10 mM 2-mercaptoethanol, 0.25% w/v Triton X-100, pH 8.0) for one hour at 4°C with rotation. EDTA was added to the eluate to give a concentration of 5 mM. The buffer was exchanged into Reverse Transcription buffer (50 mM Tris(hydroxymethyl) amino methane, 75 mM KCl, 3 mM MgCl<sub>2</sub> pH 8.3) on a gel filtration column (Pharmacia, Piscataway, NJ). The mRNA-displayed proteins were then reverse transcribed with Superscript II (Gibco BRL, Rockville, MD) at 42°C for 30 minutes without a heat denaturation step. This sample was then exchanged into selection binding buffer (400 mM KCl, 20 mM HEPES, 4 mM MgCl<sub>2</sub>, 0.1mM EDTA, 2 mM glutathione, 1 mM glutathione disulfide, 0.25% w/v Triton X-100, pH 7.4) on a gel filtration column (Pharmacia, Piscataway, NJ), and then incubated with 100 µl of ATP-agarose (ATP attached via C8, 9 atom linker, cyanogen bromide activated cross-linked 4% beaded agarose (Sigma, St. Louis, MO)) at 4°C for one hour on a chromatography column (Bio-Rad, Hercules, CA). The column was then washed with 50 column volumes of selection binding buffer at 4°C for one hour and eluted with 12 column volumes of selection elution buffer (as selection binding buffer, but with an additional 5 mM ATP and 4.8 mM MgCl<sub>2</sub>, pH readjusted to 7.4) at 4°C for one hour. The eluted fraction was then brought to 0.1 M in NaOH, hydrolyzed at 90°C for 10 minutes, exchanged into deionized water on two successive gel filtration columns and amplified using PCR. Every round was assayed by SDS-PAGE to ensure that mRNA degradation had not occurred, and by scintillation counting of the <sup>35</sup>S-methionine labelled proteins to measure the efficiencies of the various steps. These data were then used to determine the number of purified individual protein sequences introduced into the round one selection step as  $6 \times 10^{12}$  based on the proportion of total methionine incorporated into the mRNA-displayed proteins, and the efficiency of each of the subsequent purification steps.

This procedure was repeated for 18 rounds except that in rounds 10, 11 and 12 the PCR amplification was substituted by a mutagenic PCR amplification with an average mutagenic rate of 3.7% at the amino acid level. In rounds 14, 15 and 16 the amplification cycles were preceded by two ATP-agarose selection steps, and in rounds 17 and 18 the amplification cycles were preceded by three ATP-agarose selection steps. With successive selection steps the eluted fraction was exchanged into deionized water on a gel filtration column and purified on a denaturing Ni-NTA column and reverse transcribed as described above before being incubated with the ATP-agarose for the subsequent selection step. Also, the volume of the translation reaction was reduced to 1 ml except for round 1 in which it was 10 ml, and rounds 2, 10, 11 and 12 in which it was 5 ml. In the rounds of selection preceding the initial mutagenic amplification, incubation with a butyl agarose pre-column (Sigma, St. Louis, MO) was employed with the flowthrough being used for incubation with the ATP-affinity column.

#### **K<sub>d</sub> by spin-filtration**

Purified MBP-fusion proteins were exchanged into selection binding buffer by gel filtration and mixed with  $\gamma$ -<sup>32</sup>P-ATP. These samples were incubated at 4°C for 30 minutes. 200 µl samples were then placed into Microcon-30 spin ultrafiltration devices (Millipore, Bedford, MA) and spun at 10,000g for 30 seconds with this filtrate being discarded, spinning at 10,000g for a further 45 seconds yielded a subsequent filtrate which, along with the unfiltered sample, were assayed by scintillation counting. This method was adapted from<sup>14</sup>. In competition experiments, the competitor was added after the incubation step, and then the solution was incubated for an extra 30 minutes at 4°C. Data were treated as above (K<sub>d</sub> by Equilibrium Dialysis) and according to the method of Wang and von Hippel<sup>15</sup> to measure the stoichiometry of the interaction.

#### **K<sub>d</sub> by equilibrium dialysis**

Purified MBP-fusion proteins were exchanged into selection binding buffer by gel filtration and 150 µl aliquots were placed on one side of a 14-16 kDa MWCO dialysis membrane in a Hoefer Scientific Instruments model EMD101B. Equal volumes of the same buffer containing diluted  $\gamma$ -<sup>32</sup>P-ATP were placed on the other side of the membrane. After 24 hours at 4°C, samples were removed from each side of the membrane and assayed by scintillation counting. These data were fitted to  $y=c/(x+K_d)$ , where  $x$  is the protein concentration,  $y$  the proportion of counts bound by the protein and  $c$  is the proportion of counts that are able to be bound by the protein, by an iterative algorithm (Deltagraph) to give the K<sub>d</sub>. Competition experiments against unlabelled ATP or ATP analogues were performed similarly.

Back titration of hot ATP against cold ATP to give stoichiometry of interaction

This data was fitted to  $y = b+c((ANK+PK+1)$

### Titration of MBP-(18-19) vs ATP

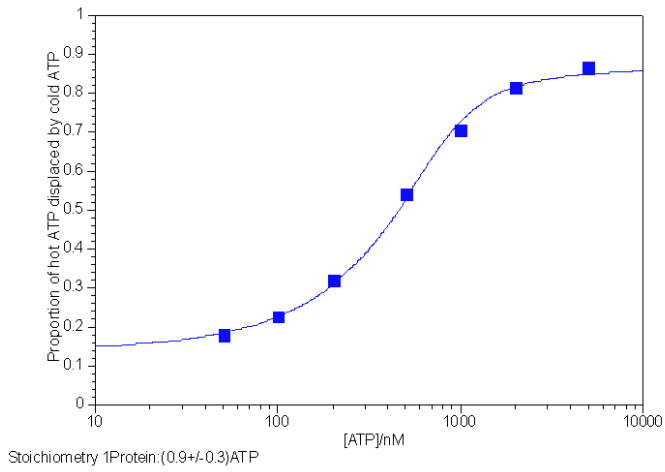

$$y = 1.420544E-1 + (7.212891E-1 * (((x/1000000000) * 1.083896E+0 * K) + (R * K) + 1) - (((x/1000000000) * 1.083896E+0 * K) + (R * K) + 1)^2 - (4 * (x/1000000000) * 1.083896E+0 * R * K * K)^{0.5}) / (2 * R * K)$$

$$R^2 = 9.974598E-1$$

$$-((ANK + PK + 1)^2 - (4ANPK^2))^{0.5} / 2PK$$

b is proportion of counts not passing through membrane, an iteratively fitted constant

c is proportion of counts bindable, an iteratively fitted constant

A is the ATP concentration

K is the association constant

P is the active protein concentration

N is the stoichiometry, an iteratively fitted constant
